# Supplementary material
Source: PubMed Central journal article supplement (PMC3806523)
Supplement: supp_mct183_mct183supp.pdf [file supp_mct183_mct183supp.pdf]

## SUPPLEMENTARY DATA

TABLE S1. Primers and references for amplification of chloroplast loci.

|           |       | Primer names and sequences | Reference                     |
|-----------|-------|----------------------------|-------------------------------|
| MatK      | 390F  | GATCTATTCATTCAATATTTTC     | Cuenoud <i>et al.</i> , 2002  |
|           | 1440R | GTGTTTACGAGCYAAAGTTC       |                               |
| TrnK-MatK | 3914F | GGGGTTGCTAACTCAACGG        | Schmitz-Linneweber, 2001      |
|           | 1110R | TATTCTGTTGATAACATTCG       |                               |
| TrnL-trnF | e     | GGTTCAAGTCCCTCTATCCC       | Taberlet <i>et al.</i> , 1991 |
|           | f     | ATTTGAACTGGTGACACGAG       |                               |
| TrnT-L    | a     | CATTACAAATGCGATGCTCT       | Taberlet <i>et al.</i> , 1991 |
|           | b     | TCTACCGATTTTCGCCATATC      |                               |

TABLE S2. Genbank accession number of the 28 haplotypes of *Arenaria provincialis* and the outgroup.

| Haplotype | Accession numbers of the four chloroplastic regions |          |          |          |
|-----------|-----------------------------------------------------|----------|----------|----------|
| H1        | JX475969                                            | JX475952 | JX475928 | JX475938 |
| H2        | JX475969                                            | JX475952 | JX475936 | JX475938 |
| H3        | JX475978                                            | JX475952 | JX475928 | JX475938 |
| H4        | JX475971                                            | JX475956 | JX475931 | JX475950 |
| H5        | JX475971                                            | JX475956 | JX475931 | JX475942 |
| H6        | JX475974                                            | JX475958 | JX475933 | JX475945 |
| H7        | JX475976                                            | JX475960 | JX475933 | JX475945 |
| H8        | JX475976                                            | JX475960 | JX475933 | JX475946 |
| H9        | JX475976                                            | JX475960 | JX475933 | JX475945 |
| H10       | JX475976                                            | JX475960 | JX475933 | JX475945 |
| H11       | JX475977                                            | JX475960 | JX475933 | JX475945 |
| H12       | JX475976                                            | JX475958 | JX475933 | JX475945 |
| H13       | JX475976                                            | JX475964 | JX475933 | JX475945 |
| H14       | JX475980                                            | JX475958 | JX475934 | JX475945 |
| H15       | JX475975                                            | JX475959 | JX475933 | JX475945 |
| H16       | JX475970                                            | JX475953 | JX475929 | JX475939 |
| H17       | JX475970                                            | JX475954 | JX475929 | JX475939 |
| H18       | JX475970                                            | JX475953 | JX475929 | JX475941 |
| H19       | JX475970                                            | JX475955 | JX475930 | JX475940 |
| H20       | JX475982                                            | JX475966 | JX475935 | JX475949 |
| H21       | JX475972                                            | JX475957 | JX475932 | JX475943 |
| H22       | JX475973                                            | JX475957 | JX475932 | JX475944 |
| H23       | JX475979                                            | JX475957 | JX475932 | JX475943 |
| H24       | JX475981                                            | JX475957 | JX475932 | JX475947 |
| H25       | JX475981                                            | JX475957 | JX475932 | JX475948 |
| H26       | JX475981                                            | JX475957 | JX475932 | JX475943 |
| H27       | JX475972                                            | JX475965 | JX475932 | JX475943 |

|                         |          |          |          |          |
|-------------------------|----------|----------|----------|----------|
| H28                     | JX475972 | JX475967 | JX475932 | JX475943 |
| <i>Arenaria cinerea</i> | JX475968 | JX475951 | JX475927 | JX475937 |
| <i>Arenaria ciliata</i> | KC524727 | KC524729 | KC524730 | KC524732 |
| <i>Arenaria hispida</i> | GU732828 | KC524728 | KC524731 | KC524733 |

TABLE S3. Cycling conditions of the PCR.

| Chloroplast sequence |               |               |               |
|----------------------|---------------|---------------|---------------|
| matK                 | trnT-trnL     | trnK-matK     | trnL-trnF     |
| 94°C 2 min           | 94°C 2 min    | 94°C 30s      | 94°C 2 min    |
| 94°C 45s             | 94°C 45s      | 94°C 30s      | 94°C 45s      |
| 48°C 45s             | 52°C 45s      | 48°C 30s      | 52°C 45s      |
| 72°C 2 min           | 72°C 2 min    | 72°C 2 min    | 72°C 2 min    |
| go to 2 rep29        | go to 2 rep31 | go to 2 rep29 | go to 2 rep31 |
| 72°C 5 min           | 72°C 5 min    | 72°C 5 min    | 72°C 5 min    |

TABLE S4. Phylogenetic autocorrelation results from Abouheif tests showing significance on the two ecological gradients provided by the OMI analysis for all haplotypes and the two phylogroups independently.

|               |       | Obs   | Std.Obs | Alter   | Pvalue |
|---------------|-------|-------|---------|---------|--------|
| All haplotype | Axis1 | 0.745 | 10.615  | greater | 0.001  |
|               | Axis2 | 0.571 | 7.982   | greater | 0.001  |
| phylogroup 1  | Axis1 | 0.525 | 5.539   | greater | 0.001  |
|               | Axis2 | 0.587 | 6.284   | greater | 0.001  |
| phylogroup 2  | Axis1 | 0.659 | 6.434   | greater | 0.001  |
|               | Axis2 | 0.575 | 5.576   | greater | 0.001  |

FIG. S1. Posterior trace of Bayesian analysis in BEAST (Tracer software); sampled values are plotted against the step in the MCMC chain.

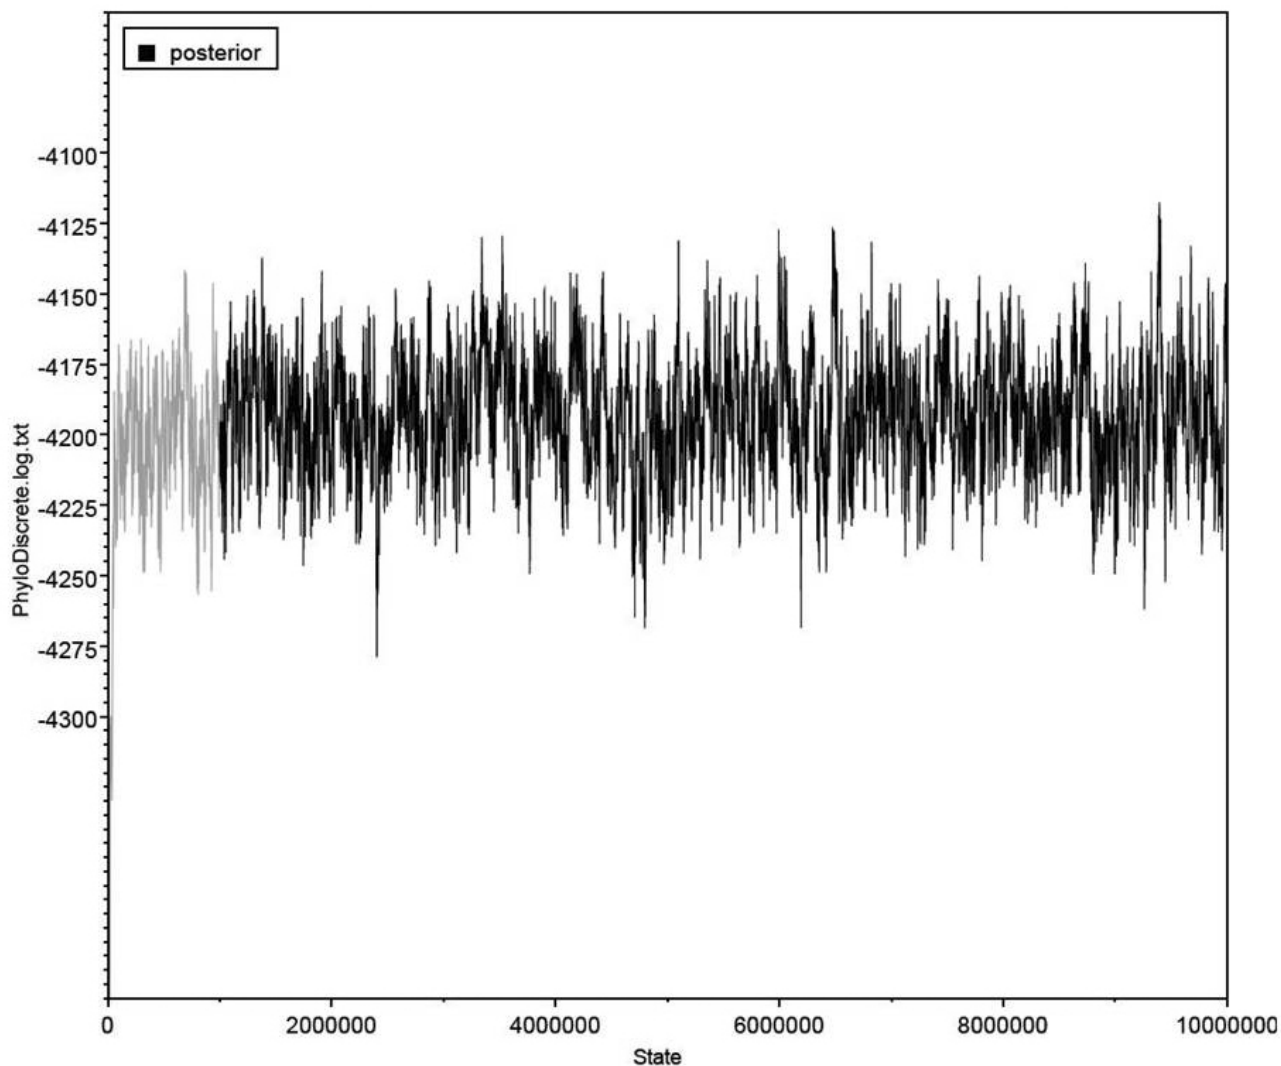

## REFERENCES

**Cuenoud P, Savolainen V, Chatrou LW, Powell M, Grayer RJ, Chase MW. 2002.** Molecular phylogenetics of Caryophyllales based on nuclear 18S rDNA and plastid *rbcL*, *atpB*, and *matK* DNA sequences. *American Journal of Botany* **89**: 132–144.

**Taberlet P, Gielly L, Patou G, Bouvet J. 1991.** Universal primers for amplification of three non-coding regions of chloroplast DNA. *Plant Molecular Biology* **17**:1105–1109.

**Schmitz-Linneweber C, Maier RM, Alcaraz JP, Cottet A, Hermann RG, Marche R. 2001.** The plastid chromosome of spinach (*Spinacia oleracea*): complete nucleotide sequence and gene organization. *Plant Molecular Biology* **45**:307–315.
